# Supplementary material
Source: HighWire-hosted journal article supplement (https://jnm.snmjournals.org/highwire/filestream/105308/field_highwire_adjunct_files/0/262685_Supplemental_Data.pdf)

**Supplemental Figure 1:** Relationships between non-PVC 18F-flortaucipir uptake (SUVR) and lesion type adjusting for time from imaging to death, age at death and total intracranial volume (TIV). NFT = neurofibrillary tangle; PVC = partial volume correction

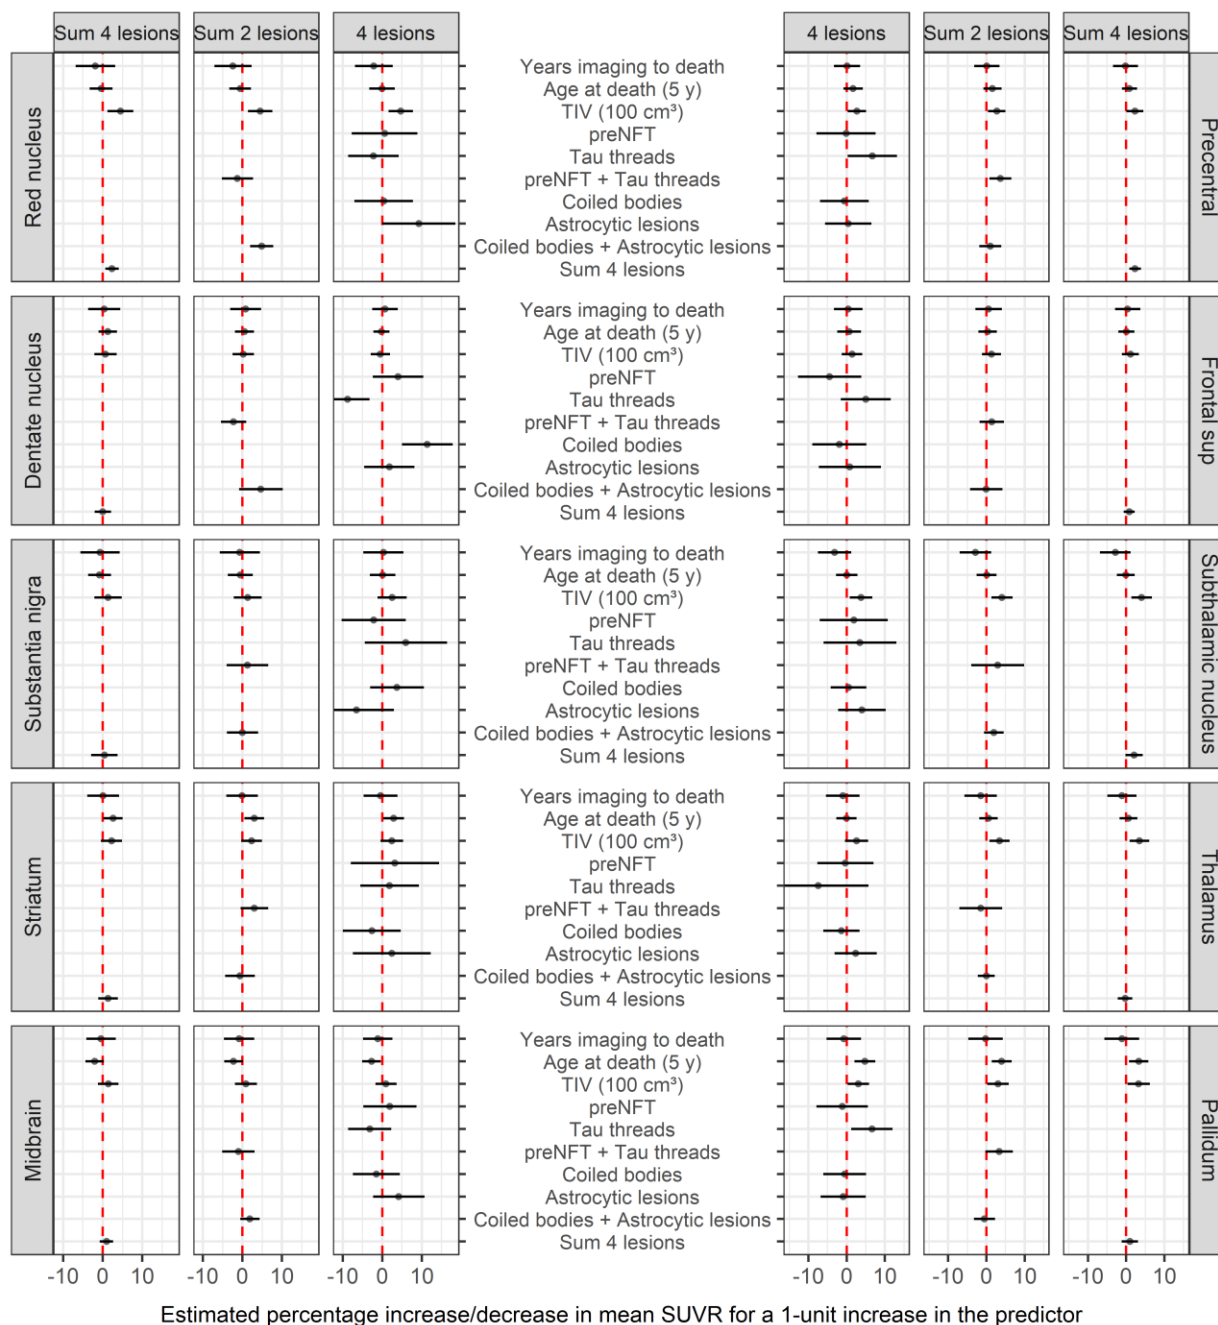

Supplement: 262685_Supplemental_Data.pdf [file 262685_Supplemental_Data.pdf]
